# Supplementary material for: Surveillance and Genomics of Toxigenic Vibrio cholerae O1 From Fish, Phytoplankton and Water in Lake Victoria, Tanzania
Source: Front Microbiol. 2019 Apr 30;10:901. doi: 10.3389/fmicb.2019.00901 (PMC6503148; doi:10.3389/fmicb.2019.00901)
Supplement: Supplementary file 2 [file Table_2.XLSX]

## Sheet: TABLE S2
	Table S2. Outbreak strains used in the comparative phylogeny
Biosample Accession	Country	Year
SAMN06144941	Tanzania	2015-09
SAMN06144953	Tanzania	2015-09
SAMN06144945	Tanzania	2015-08
SAMN06144949	Tanzania	2015-08
SAMN06144956	Tanzania	2015-10
SAMN06144954	Tanzania	2015-10
SAMN06144946	Tanzania	2015-01
SAMN06144951	Tanzania	2015-01
SAMN06144965	Tanzania	2015-01
SAMN06144971	Tanzania	2015-01
SAMN06144960	Tanzania	2012-01
SAMN06144964	Tanzania	2012-01
SAMN06144970	Tanzania	2012-01
SAMN06144972	Tanzania	2012-01
SAMN06144961	Tanzania	2011-12
SAMEA889185	Tanzania	2009
SAMEA3303706	Tanzania	1998
SAMEA3303707	Tanzania	1998
SAMEA103905031	Tanzania	1998
SAMEA103908354	Tanzania	1997
SAMEA3303477	Tanzania	1993
SAMEA889227	Kenya	2009
SAMEA889235	Kenya	2007
SAMN03436158	Kenya	2015
SAMN03436156	Kenya	2015
SAMN08744327	Uganda	2014
SAMN08744333	Uganda	2015
SAMN08744335	Uganda	2015
SAMN08744331	Uganda	2016
SAMEA2445324	DR Congo	2013
SAMEA2445284	DR Congo	2013
SAMEA2445182	Zambia	2012
SAMEA2445183	Zambia	2012
SAMEA103900042	Burundi	2001
SAMEA103900043	Burundi	2001
SAMEA103900014	Rwanda	2000
SAMEA103900015	Rwanda	2000
