# Supplementary material for: Surveillance and Genomics of Toxigenic Vibrio cholerae O1 From Fish, Phytoplankton and Water in Lake Victoria, Tanzania
Source: Front Microbiol. 2019 Apr 30;10:901. doi: 10.3389/fmicb.2019.00901 (PMC6503148; doi:10.3389/fmicb.2019.00901)
Supplement: Supplementary file 4 [file Table_4.XLSX]

## Sheet: ICEVchHai1
Table S4. Comparison of ICEVchHai1 gene loci with the V. cholerae strains
Gene locus	Gene product	Fish1	Fish2	Fish3	Fish4	Plankton1	Plankton2	Plankton3	Water1	Water2	Water3
VC1786ICE78	Putative DNA-binding protein	-	-	-	-	-	-	-	-	-	-
VC1786ICE1	Conserved hypothetical protein	+	+	+	+	-	+	+	+	+	+
VC1786ICE2	Phage integrase family protein	+	+	+	+	-	+	+	+	+	+
VC1786ICE79	Conserved hypothetical protein	+	+	+	+	-	+	+	+	+	+
VC1786ICE3	Putative PRTRC system protein D	+	+	+	+	-	+	+	+	+	+
VC1786ICE4	Conserved hypothetical protein	+	+	+	+	-	+	+	+	+	+
VC1786ICE5	UV repair DNA polymerase	+	+	+	+	-	+	+	+	+	+
VC1786ICE80	Transposase Tn3	+	+	+	+	-	+	+	+	+	+
VC1786ICE6	Transposase Tn3 family protein	+	-	+	-	-	-	-	-	+	-
VC1786ICE81	Replication-associated protein A, RepA	+	-	+	-	-	-	-	-	+	-
VC1786ICE7 insA	Transposase InsA	+	-	+	-	-	-	-	-	+	-
VC1786ICE8	Conserved hypothetical protein	+	-	+	-	-	-	-	-	+	-
VC1786ICE9 floR	Drug resistance transporter, Bcr/CflA subfamily	+	-	+	-	-	-	-	-	+	-
VC1786ICE83	Transcriptional regulator LysR family	+	-	+	-	-	-	-	-	+	-
VC1786ICE10	Putative transposase	+	-	+	-	-	-	-	-	+	-
VC1786ICE11 strB	Streptomycin resistance protein StrB	+	-	+	-	-	-	-	-	+	-
VC1786ICE12 strA	Aminoglycoside resistance protein A	+	-	+	-	-	-	-	-	+	-
VC1786ICE13 Sul2	Dihydropteroate synthase 2	+	-	+	-	-	-	-	-	+	-
VC1786ICE84	Conserved hypothetical protein	+	-	+	-	-	-	-	-	+	-
VC1786ICE14	Transposase	-	+	-	+	-	+	+	+	-	+
VC1786ICE15	Transposase Mutator family	+	+	+	+	-	+	+	+	+	+
VC1786ICE16 mutL	MutL protein	+	+	+	+	-	+	+	+	+	+
VC1786ICE17	Error-prone repair protein UmuC	+	+	+	+	-	+	+	+	+	+
VC1786ICE18	DNA polymerase V	+	+	+	+	-	+	+	+	+	+
VC1786ICE19	DNA polymerase III subunit epsilon	+	+	+	+	-	+	+	+	+	+
VC1786ICE20	Conserved hypothetical plasmid-related protein	+	+	+	+	-	+	+	+	+	+
VC1786ICE21	Conserved hypothetical protein	+	+	+	+	-	+	+	+	+	+
VC1786ICE22	Conserved hypothetical protein	+	+	+	+	-	+	-	+	-	+
VC1786ICE85	Conserved hypothetical protein	+	+	+	+	-	+	+	+	+	+
VC1786ICE23	Conserved hypothetical protein	+	+	+	+	-	+	+	+	+	-
VC1786ICE24	Conserved hypothetical protein	+	+	+	+	-	+	+	+	+	+
VC1786ICE25 pglZ	PglZ domain protein	+	+	+	+	-	+	+	+	+	+
VC1786ICE26	ATP-dependent protease	+	+	+	+	-	+	+	+	+	+
VC1786ICE27	Conserved hypothetical protein	+	+	+	+	-	+	+	+	+	+
VC1786ICE28	Conserved hypothetical protein	+	+	+	+	-	+	+	+	+	+
VC1786ICE29 traI	Conjugal transfer pilus assembly protein TraI	+	+	+	+	-	+	+	+	+	+
VC1786ICE30 traD	Conjugal transfer pilus assembly protein TraD	+	+	+	+	-	+	+	+	+	+
VC1786ICE31	Conserved hypothetical protein	+	+	+	+	-	+	+	+	+	+
VC1786ICE32	integrating conjugative element membran protein	+	+	+	+	-	+	+	+	+	+
VC1786ICE33	Conserved hypothetical protein	+	+	+	+	-	+	+	+	+	+
VC1786ICE86	Conserved hypothetical protein	+	+	+	+	-	+	+	+	+	+
VC1786ICE34traL	Type IV conjugative transfer system protein TraL	+	+	+	+	-	+	+	+	+	+
VC1786ICE35 traE	Type IV conjugative transfer system protein TraE	+	+	+	+	-	+	+	+	+	+
VC1786ICE36 traK	Conjugal transfer pilus assembly protein TraK	+	+	+	+	-	+	+	+	+	+
VC1786ICE37 traB	TraB pilus assembly family protein	+	+	+	+	-	+	+	+	+	+
VC1786ICE38 traV	Type IV conjugative transfer system protein TraV	+	+	+	+	-	+	+	+	+	+
VC1786ICE39 traA	Conjugal transfer pilus assembly protein TraA	+	+	+	+	-	+	+	+	+	+
VC1786ICE40	Conserved hypothetical protein	+	+	+	+	-	+	+	+	+	+
VC1786ICE41	Conserved hypothetical protein	+	+	+	+	-	+	+	+	+	+
VC1786ICE42	Putative thiol:disulfide interchange protein DsbC	+	+	+	+	-	+	+	+	+	+
VC1786ICE43 traC	Type-IV secretion system protein TraC	+	+	+	+	-	+	+	+	+	+
VC1786ICE44	Conserved hypothetical protein	+	+	+	+	-	+	+	+	+	+
VC1786ICE45	K12062 conjugal transfer pilin signal peptidase TrbI	+	+	+	+	-	+	+	+	+	+
VC1786ICE46 traW	Type-F conjugative transfer system protein TraW	+	+	+	+	-	+	+	+	+	+
VC1786ICE47 traU	Conjugative transfer pilus assembly protein TraU	+	+	+	+	-	+	+	+	+	+
VC1786ICE48 traN	type-F conjugative transfer system mating-pairstabilization protein TraN	+	+	+	+	-	+	+	+	+	+
VC1786ICE49	Putative SMC protein	+	+	+	+	-	+	+	+	+	+
VC1786ICE50	IstB ATP binding domain-containing protein	+	+	+	+	-	+	+	+	+	+
VC1786ICE51	Integrase catalytic subunit IstA	+	+	+	+	-	+	+	+	+	+
VC1786ICE52	Putative SMC domain protein	+	+	+	+	-	+	+	+	+	+
VC1786ICE53	Endonuclease I	+	+	+	+	-	+	+	+	+	+
VC1786ICE54	Conserved hypothetical protein	+	+	+	+	-	+	+	+	+	+
VC1786ICE87	Conserved hypothetical protein	+	+	+	+	-	+	+	+	+	+
VC1786ICE55 ssb	Single-strand binding protein	+	+	+	+	-	+	+	+	+	+
VC1786ICE56 bet	Phage recombination protein Bet	+	+	+	+	-	+	+	+	+	+
VC1786ICE88	Hypothetical protein	+	+	+	+	-	+	+	+	+	+
VC1786ICE57	Putative phage-type endonuclease	+	+	+	+	-	+	+	+	+	+
VC1786ICE58 cobs	Cobaltochelatase, CobS subunit	+	+	+	+	-	+	+	+	+	+
VC1786ICE59	Conserved hypothetical protein	+	+	+	+	-	+	+	+	+	+
VC1786ICE60	Conserved hypothetical plasmid-related protein	+	+	+	+	-	+	+	+	+	+
VC1786ICE61	Conserved hypothetical protein	+	+	+	+	-	+	+	+	+	+
VC1786ICE62	Conserved hypothetical protein	+	+	+	+	-	+	+	+	+	+
VC1786ICE63	DNA repair protein RadC	+	+	+	+	-	+	+	+	+	+
VC1786ICE64	Conserved hypothetical protein	+	+	+	+	-	+	+	+	+	+
VC1786ICE65	Putative zinc-binding domain of primase-helicase family	+	+	+	+	-	+	+	+	+	+
VC1786ICE66	Conserved hypothetical protein	+	+	+	+	-	+	+	+	+	+
VC1786ICE89	Glyoxalase/bleomycin resistance protein/Dioxygenase	+	+	+	+	-	+	+	+	+	+
VC1786ICE67	Conserved hypothetical protein	+	+	+	+	-	+	+	+	+	+
VC1786ICE90	Conserved hypothetical protein	+	+	+	+	-	+	+	+	+	+
VC1786ICE91	DNA-binding HTH domain-protein	+	+	+	+	-	+	+	+	+	+
VC1786ICE92	Hypothetical protein	+	+	+	+	-	+	+	+	+	+
VC1786ICE93 dfrA1	Dihydrofolate reductase type 1 (trimethoprimresistance protein)	+	+	+	+	-	+	+	+	+	+
VC1786ICE68	Integron integrase	+	+	+	+	-	+	+	+	+	+
VC1786ICE69 traF	Type-F conjugative transfer system pilinassembly protein TraF	+	+	+	+	-	+	+	+	+	+
VC1786ICE70 traH	Conjugative transfer pilus assembly proteinTraH	+	+	+	+	-	+	+	+	+	+
VC1786ICE71 traG	Conjugal transfer mating pair stabilization protein TraG	+	+	+	+	-	+	+	+	+	+
VC1786ICE94	Putative phage membrane protein	+	+	+	+	-	+	+	+	+	+
VC1786ICE72 flhC	Flagellar transcriptional activator FlhC	+	+	+	+	-	+	+	+	+	+
VC1786ICE73 flhD	Flagellar transcriptional activator FlhD	+	+	+	+	-	+	+	+	+	+
VC1786ICE74	Lytic transglycosylase	+	+	+	+	-	+	+	+	+	+
VC1786ICE75	Conserved hypothetical protein	+	+	+	+	-	+	+	+	+	+
VC1786ICE76	Conserved hypothetical protein	+	+	+	+	-	+	+	+	+	+
VC1786ICE95	Putative phage regulatory protein	+	+	+	+	-	+	+	+	+	+
VC1786ICE77	Putative phage repressor protein	+	+	+	+	-	+	+	+	+	+
